# Supplementary figures and images for: Distinct plasma-membrane PtdIns(4)P and PtdIns(4,5)P2 dynamics in secretagogue-stimulated β-cells
Source: Oxford University Press journal article supplement (doi:10.1242/jcs.060525), 2010-04-08

**A**FAPP1<sub>PH</sub>-CFP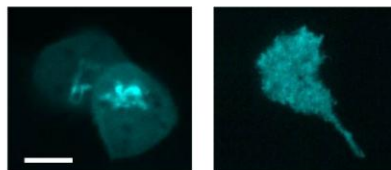

Confocal

TIRF

**B**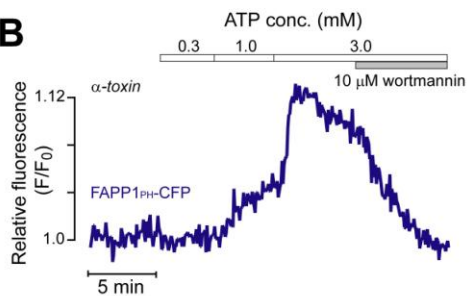**C**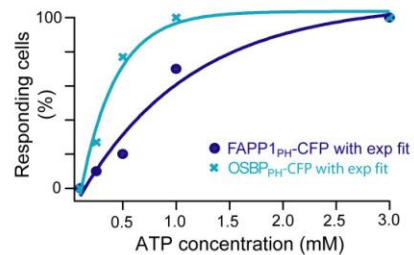**D**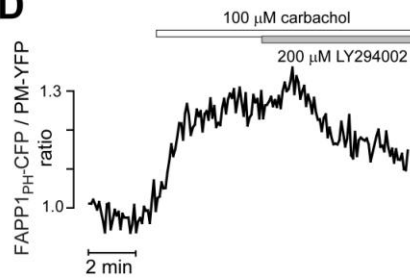**E**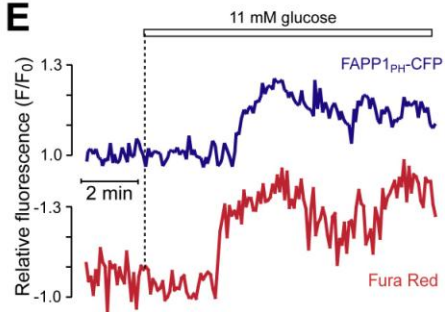

Supplement: jcs060525figs1.pdf [file jcs060525figs1.pdf]
